# Supplementary material for: Identification of a novel subtype of astrocytes in HIV-associated pain pathogenesis
Source: Research Square preprint supplement (doi:10.21203/rs.3.rs-2782598/v1), 2023-04-12
Supplement: Supplementary file 1 [file 9d9399421e227655e690ab57.pdf]

## Reporting Summary

Nature Portfolio wishes to improve the reproducibility of the work that we publish. This form provides structure for consistency and transparency in reporting. For further information on Nature Portfolio policies, see our [Editorial Policies](#) and the [Editorial Policy Checklist](#).

### Statistics

For all statistical analyses, confirm that the following items are present in the figure legend, table legend, main text, or Methods section.

n/a Confirmed

- The exact sample size ( $n$ ) for each experimental group/condition, given as a discrete number and unit of measurement
- A statement on whether measurements were taken from distinct samples or whether the same sample was measured repeatedly
- The statistical test(s) used AND whether they are one- or two-sided  
*Only common tests should be described solely by name; describe more complex techniques in the Methods section.*
- A description of all covariates tested
- A description of any assumptions or corrections, such as tests of normality and adjustment for multiple comparisons
- A full description of the statistical parameters including central tendency (e.g. means) or other basic estimates (e.g. regression coefficient) AND variation (e.g. standard deviation) or associated estimates of uncertainty (e.g. confidence intervals)
- For null hypothesis testing, the test statistic (e.g.  $F$ ,  $t$ ,  $r$ ) with confidence intervals, effect sizes, degrees of freedom and  $P$  value noted  
*Give  $P$  values as exact values whenever suitable.*
- For Bayesian analysis, information on the choice of priors and Markov chain Monte Carlo settings
- For hierarchical and complex designs, identification of the appropriate level for tests and full reporting of outcomes
- Estimates of effect sizes (e.g. Cohen's  $d$ , Pearson's  $r$ ), indicating how they were calculated

*Our web collection on [statistics for biologists](#) contains articles on many of the points above.*

### Software and code

Policy information about [availability of computer code](#)

#### Data collection

The raw sequencing data (fastq files) were collected at the Single Cell Genomics Core, Baylor College of Medicine, USA. Fastq raw data are available at <https://www.ncbi.nlm.nih.gov/geo/query/acc.cgi?acc=GSE228974>. Data for Immunofluorescent staining, Fluoro-Jade C staining, western blot and pain behavior were collected at Shao-jun Tang's lab at the Department of Neurobiology, University of Texas Medical Branch, Galveston, TX, USA.

#### Data analysis

The raw sequencing data were pre-processed using Cell Ranger (v.3.1.0) (10X Genomics). The resulting filtered single-cell expression matrices files from the WT, gp120Tg, gp120Tg/Gal3<sup>-/-</sup>, and Gal3<sup>-/-</sup> mice were imported into R for Seurat snRNA-seq integration analysis. Seurat R package (v.4.0.5) was utilized for dimension reduction and cluster analysis. R code for snRNA-seq can be available at [github.com/tang-lab/astrocyte-critical-for-hiv-pain-pathogenesis](https://github.com/tang-lab/astrocyte-critical-for-hiv-pain-pathogenesis).

For manuscripts utilizing custom algorithms or software that are central to the research but not yet described in published literature, software must be made available to editors and reviewers. We strongly encourage code deposition in a community repository (e.g. GitHub). See the Nature Portfolio [guidelines for submitting code & software](#) for further information.

## Data

Policy information about [availability of data](#)

All manuscripts must include a [data availability statement](#). This statement should provide the following information, where applicable:

- Accession codes, unique identifiers, or web links for publicly available datasets
- A description of any restrictions on data availability
- For clinical datasets or third party data, please ensure that the statement adheres to our [policy](#)

All data which supports the findings here can be found in the manuscript and supplementary information. Source data for all experiments are provided with this study. The accession number for the snRNA-seq reported in this paper is GSE228974. The code used for the analysis described in this paper can be accessed upon requested.

## Research involving human participants, their data, or biological material

Policy information about studies with [human participants or human data](#). See also policy information about [sex, gender \(identity/presentation\), and sexual orientation](#) and [race, ethnicity and racism](#).

|                                                                    |                                                                   |
|--------------------------------------------------------------------|-------------------------------------------------------------------|
| Reporting on sex and gender                                        | <input type="text" value="no human participants in this study."/> |
| Reporting on race, ethnicity, or other socially relevant groupings | <input type="text" value="no human participants in this study."/> |
| Population characteristics                                         | <input type="text" value="no human participants in this study."/> |
| Recruitment                                                        | <input type="text" value="no human participants in this study."/> |
| Ethics oversight                                                   | <input type="text" value="no human participants in this study."/> |

Note that full information on the approval of the study protocol must also be provided in the manuscript.

## Field-specific reporting

Please select the one below that is the best fit for your research. If you are not sure, read the appropriate sections before making your selection.

Life sciences       Behavioural & social sciences       Ecological, evolutionary & environmental sciences

For a reference copy of the document with all sections, see [nature.com/documents/nr-reporting-summary-flat.pdf](https://nature.com/documents/nr-reporting-summary-flat.pdf)

## Life sciences study design

All studies must disclose on these points even when the disclosure is negative.

|                 |                                                                                                                                                                                                                                                                                                                                                                 |
|-----------------|-----------------------------------------------------------------------------------------------------------------------------------------------------------------------------------------------------------------------------------------------------------------------------------------------------------------------------------------------------------------|
| Sample size     | <input type="text" value="Sample sizes were determined based on published work in literature. There are 4 groups (WT, gp120Tg, gp120TgGal3-/-, and Gal3-/-) for snRNA-seq study. Each group has 1 sample pooled from 3 mice. For all other studies, the sample sized are: n=4 for the WT group, n=6 for the gp120Tg group; n=3 for the gp120TgGal3-/- group."/> |
| Data exclusions | <input type="text" value="For snRNA-seq data, we set the filter criteria of nFeature_RNA &gt; 200 and nFeature_RNA &lt; 5000 as a QC control to remove the dead, low-quality nuclei, and doublets."/>                                                                                                                                                           |
| Replication     | <input type="text" value="Except the snRNA-seq, all other experiment were replicated at least three times."/>                                                                                                                                                                                                                                                   |
| Randomization   | <input type="text" value="Age- and sex-matched mice were randomly chosen for control and experimental groups."/>                                                                                                                                                                                                                                                |
| Blinding        | <input type="text" value="The pain behavioral tests were performed by experimenters who were not notified with the information about animal groups."/>                                                                                                                                                                                                          |

## Reporting for specific materials, systems and methods

We require information from authors about some types of materials, experimental systems and methods used in many studies. Here, indicate whether each material, system or method listed is relevant to your study. If you are not sure if a list item applies to your research, read the appropriate section before selecting a response.

## Materials &amp; experimental systems

## Methods

- n/a Involved in the study
- Antibodies
- Eukaryotic cell lines
- Palaeontology and archaeology
- Animals and other organisms
- Clinical data
- Dual use research of concern
- Plants

- n/a Involved in the study
- ChIP-seq
- Flow cytometry
- MRI-based neuroimaging

## Antibodies

- Antibodies used
- Validation

## Animals and other research organisms

Policy information about [studies involving animals](#); [ARRIVE guidelines](#) recommended for reporting animal research, and [Sex and Gender in Research](#)

- Laboratory animals
- Wild animals
- Reporting on sex
- Field-collected samples
- Ethics oversight

Note that full information on the approval of the study protocol must also be provided in the manuscript.
